# Supplementary material for: An Autochthonous Mouse Model of Myd88 - and BCL2 -Driven Diffuse Large B-cell Lymphoma Reveals Actionable Molecular Vulnerabilities
Source: Oxford University Press journal article supplement (doi:10.1158/2643-3230.bcd-19-0059), 2020-11-02
Supplement: 26433230bcd190059-sup-232346_2_supp_6661558_qlhv2v.xlsx [file 26433230bcd190059-sup-232346_2_supp_6661558_qlhv2v.xlsx]

## Sheet: Tabelle1
Values represent IC50 values (nM). Maximum concentration tested was 25000nM.
inhibitor	inhibitor_group	OCI-LY7	RL-1	SUDHL10	U932	M19B-0108	M191	M552
5-Azacytidine	1	394.067	17484.3	1424	14026	25000	25000	23349.3
5-Fluorouracil	1	8639	25000	16610.3	12402.3	44.4933	23.33	82.64
6-Mercaptopurine	1	584.533	22292.3	1951	2935.33	25000	25000	25000
6-Thioguanine	1	277.8	7578.33	548.233	1020.53	2201	2048	3412.67
Clofarabine	1	38.8567	1177	45.3233	9.94133	456.333	272.6	120.367
Cytarabine	1	66.23	22549.3	8084.33	1265.67	1207.37	1400	1900.33
Dacarbazine	1	19719	25000	7780.67	25000	25000	25000	24809.3
Fludarabine (phosphate)	1	22474.3	530.967	25000	441.2	985.567	654.1	495.867
Gemcitabine	1	47.5	1248.2	125.133	134.1	409.6	530.7	346.233
Nelarabine	1	6258.67	2033.67	8856.33	13940.3	17531	15559	25000
Cladribine	1	289.5	3435.33	108.277	3946	9662	1095	2701.67
Methotrexate	1	998.6	14541.7	57.7133	241.667	14.04	35.06	29.8833
Pentostatin	1	44358.3	25000	25000	25000	44470	25000	40492.7
Vinblastine (sulfate)	2	4.78767	101.86	16.526	58.2233	123.467	150.1	61.97
Vincristine (sulfate)	2	10.5663	37.4233	18.2473	58.5867	178.167	172	90.3967
Busulfan	3	17286	24918.7	25000	25000	12953.7	25000	25000
Carmustine	3	12345	16117.7	25000	11251.3	10871	25000	19805
Cisplatin	3	45828.3	25000	25000	25000	25000	25000	25000
Cyclophosphamide (Clafen)	3	29638	25000	25000	25000	25000	25000	25000
Lomustine	3	10484.3	15007.7	25000	9299	10297.3	25000	7415.67
Oxaliplatin	3	18005	10979	17915.3	3316	6759	2090	743
Thio-TEPA	3	8960	17872.3	17226.7	2585.33	3034.33	5960	1716.67
Procarbazine (Hydrochloride)	3	23939.3	25000	25000	22888.7	25000	25000	23469
Temozolomide	3	25000	25000	25000	25000	25000	25000	25000
Chlorambucil	3	5779	20396.3	21853	3087.33	4567.33	6747	1449
Epirubicin (hydrochloride)	4	72.3267	638.933	87.75	114.243	126.257	183.1	90.3167
Etoposide	4	614	2552	575	973.7	766.1	1160	642.267
Idarubicin (hydrochloride)	4	9.81733	112.733	48.38	30.82	14.83	21.29	9.01133
Mitoxantrone (dihydrochloride)	4	49.15	309.967	92.5233	88.5567	38.74	42.33	31.64
Teniposide	4	116.823	861.7	166.987	111.47	44.45	111.8	68.8367
Daunorubicin (Hydrochloride)	4	33.02	185.633	94.0067	82.3867	110.993	113.4	50.3033
Doxorubicin (hydrochloride)	4	179.933	1142.97	165.933	204.6	275.633	410.6	151.7
Cabozantinib (S-malate)	5	1968.33	25000	2461	25000	18301.3	25000	14939.7
Erlotinib	5	3592	22414.3	1606.67	52551.3	25000	25000	8952
Gefitinib	5	3905.67	9825.67	2365.33	8509	12726.7	9357	5355.67
Sunitinib (malate)	5	1323	6616.33	901.167	7824	8595.33	7266	3368.33
Axitinib	5	452.9	25000	900.467	25000	25000	25000	3817.67
Belinostat	6	70.8433	50.5867	61.5	308.533	268.967	82.22	228.767
CI-994	6	1787.33	2926.67	1494.67	6084.33	4058.33	2427	2366
Panobinostat	6	18.7433	29.2833	33.1967	109.4	76.6633	40.75	58.9567
Romidepsin	6	4.67367	4.631	4.68267	4.87467	5.10767	5.049	6.24433
Tubastatin A (Hydrochloride)	6	14108.7	18053.7	25000	8580.67	18145.3	17694	8470.67
Givinostat (ITF2357)	6	121.567	156.7	85.2233	696.1	515.9	221.4	354.333
Vorinostat	6	619.233	425.433	500.367	3018	1837.67	994.4	2843
Entinostat	6	957.3	804.933	785.633	3049	2151.67	1309	3000
Ricolinostat	6	3371.33	1958.67	2905.33	16465.3	25000	21224	25000
Pracinostat	6	147.3	195.733	42.3467	1291.33	587.333	199.4	384.767
Abexinostat	6	127.767	216.767	56.5567	1039.9	650.233	283.2	516.433
Quisinostat	6	4.489	5.062	4.509	25.8433	20.88	4.968	11.24
Bortezomib	7	4.61333	4.706	4.60867	6.22267	23.89	5.478	6.30167
MLN-9708	7	12.5933	17.54	17.2167	24.4267	172.8	34.41	43.8433
Carfilzomib	7	4.56967	4.58433	4.62767	5.33467	19.5733	12.64	21.5267
Ganetespib	8	14.5733	121.383	15.17	146.167	27.4933	14.78	37.4667
PUH71	8	148.067	1240	144.767	2196.33	565.7	326.1	791.667
AUY922 (LUMINESPIB)	8	6.07867	31.7167	6.919	86.1933	18.9367	8.739	15.45
NVP-HSP990	8	13.6967	114.767	15.1233	236.167	29.19	14.61	28.2433
Onalespib (AT13387)	8	17.5633	125.067	22.8867	340.267	40.5267	26.75	45.6533
PF-04929113	8	36.44	219.9	36.9667	596.367	97.3	51.01	87.3667
BIIB021	8	141.753	1267.67	123.4	2120.33	222.833	175.9	143.667
Alisertib	9	54.54	25000	116.283	29260.7	25000	25000	20749.7
Aurora A Inhibitor I	9	204.567	1026.93	100.66	1404.33	1071.33	985.7	53.9667
MLN8054	9	497.133	16621.3	454.933	25000	37327.3	25000	4592.33
MK-5108 (VX-689)	9	1256.93	25000	406.667	25000	8386	10692	18396
Danusertib	9	109.1	25000	188.967	25000	25000	25000	17897.3
GSK 525762A	10	2376	3140.33	85.9333	28939.7	1492.67	543.3	234.9
OTX-015	10	535.3	425.567	28.6167	4209.67	331.1	107.3	60.83
JQ1	10	524.7	415.533	43.6867	4651	235.3	97.13	49.61
EPZ-6438 ( Tazemetostat)	11	22070	25000	1047.67	25000	25000	25000	22210.7
GSK126	11	8248	19626.3	1184.07	11753.3	21714.7	25000	24919.7
GSK343	11	6212.67	20781.3	783.967	17518.3	20110.3	11578	11012
Decitabine	12	6.18833	25000	136.467	25000	25000	25000	25000
ND-2158	13	3344.33	11105.7	1954.33	8907	5720.67	7923	8118.67
PF06650883	13	13047.3	25000	12773.3	25000	22913	25000	25000
LY-2409881	13	25000	21262.7	25000	54578.7	4138	2650	12753.3
Imatinib (Mesylate)	14	8551	25000	9081	24791.7	20425.7	12675	15739
Radotinib	14	25000	25000	25000	25000	25000	25000	16300
Nilotinib	14	11873.7	25000	16907.7	26445.7	25000	25000	23960.7
Ponatinib	14	117.433	1631	1659	2445.67	1950.67	2273	1624
Bosutinib	14	1800.33	5153	3998.33	8031.33	13465.7	8627	6205.33
Dasatinib	14	128.667	562.8	20.55	11647.7	20107.7	13772	5824.33
Rebastinib (DCC-2036)	14	1864	25000	5318.67	28118.7	3154.67	4203	1858.33
Perifosine	15	4582	15903	23046	12900	34740.3	25000	25000
ARQ-092 (Miransertib)	15	1163.6	14096.3	1379.87	23907	21114.3	25000	25000
GSK2110183 (Afuresertib)	15	175.8	1309.5	76.53	884.6	4721.67	8674	4411.67
SY-1365-THZ1	15	9.41767	65.5867	6.56567	112.62	190.167	71.82	220.3
LEE011 (Ribociclib)	15	12251.3	25000	4375	25000	19278.7	25000	25000
LY2835219 (Abemaciclib)	15	531.367	9287.67	81.0733	9435.67	7534.67	10207	558.9
Palbociclib	15	4044.67	25000	234.633	25000	20079	25000	25000
Dinaciclib	15	5.15067	7851.33	4.86533	55.6067	38.72	15.92	39.8233
Dovitinib	15	675.267	1760	211.267	5948.67	1288.67	2003	1203
GDC-0994	15	9051.67	23612.3	4270	25000	22804.3	16598	25000
Quizartinib	15	13894.3	25000	5992.67	25000	2213.67	6902	9062.33
KW-2449	15	337.567	1927.67	600.7	7004.33	4152.67	5827	3573
Pacritinib	15	328.1	973.533	204.433	1674.67	2575.67	1682	1345.33
BMS-911543	15	25000	25000	25000	25000	25000	25000	25000
AT9283	15	15.54	263.733	54.3733	3589.33	1429	275.3	3851.33
Baricitinib (phosphate)	15	19327.7	25000	25000	25000	22404.3	25000	25000
CYT387 (Momelotinib)	15	6299.67	21083	10185	15045.3	10151.3	11756	24874
Ruxolitinib (phosphate)	15	8661	21408.7	10693	23603	18217	25000	25000
Tofacitinib (citrate)	15	25000	25000	25000	25000	38343.7	25000	25000
Midostaurin	15	219.3	184.267	108.9	1802.67	1272.9	704.4	683.367
Lestaurtinib	15	42.5633	45.09	21.0867	96.6333	127.613	75.66	221.533
Fedratinib (TG101348)	15	404.667	1159.37	236.7	3629.33	4443.67	4113	3652.67
Crenolanib	15	1075	4499	327.433	7613.67	6963.67	6267	8732.67
Ipatasertib (GDC-0068)	15	807.267	15871.3	463.467	13977.3	25000	25000	25000
Barasertib	15	10.2187	25000	13.13	25000	25000	25000	25000
Buparlisib	15	648.267	4975	342.633	3241	4545	3688	3234.33
Dactolisib (BEZ235)	15	76.13	19236.7	54.0007	3396	405.1	2893	1857
Saracatinib	15	3692.67	25000	3960.67	25000	24051.3	25000	25000
Gandotinib	15	1304.87	4049	499	4591.33	15342.3	7968	23128.7
Pexidartinib	15	25000	25000	25000	25000	48065.3	25000	25000
BI2536	15	5.748	94.9267	10.443	34.73	164.767	199.8	279.167
Foretinib	15	257.3	4945.33	182.067	7718	4138	4346	3311.33
Cobimetinib	15	20478.7	23338.7	16071.7	25000	21718.7	25000	25000
MEK162 (Binimetinib)	15	25000	25000	25000	25000	25000	25000	25000
Selumetinib	15	25000	25000	25000	25000	25000	25000	25000
Trametinib	15	18714.3	25000	25000	25000	23767.3	25000	25000
PD0325901	15	25000	25000	25000	25000	25000	25000	25000
PD184352	15	25000	25000	19109.7	25000	25000	25000	25000
Pimasertib	15	25620.7	25000	25000	25000	25000	25000	21661
Deforolimus	15	41.2033	2259.33	4.65133	10740	7011.33	12773	183.467
Everolimus	15	25.7133	1923	4.66033	2204	1007.87	701	50.6267
Rapamycin	15	28.4433	1762	4.63133	1930.67	1071.87	1015	46.43
Temsirolimus	15	25.8333	1320.93	4.67267	2038	573.1	466.6	45.8533
PF-04691502	15	43.2333	868.033	13.3167	557.5	1446	1169	248.933
INK 128 (MLN0128)	15	13.4667	645.4	7.77967	390.6	76.6033	61.63	21.22
Losmapimod	15	25000	25000	17787.3	25000	8549	25000	232.2
BAY 80-6946	15	98.5133	6100.67	38.1433	3429.33	22752.3	25000	7627.33
Idelalisib	15	2776	22765.3	85.5067	25000	25000	25000	2939
Pictilisib GDC-0941	15	172.167	7159.33	47.5033	10627	25000	25000	9695.33
Dabrafenib (Mesylate)	15	2928.67	4351	164.267	25000	13754.3	3565	3109.67
Sorafenib (Tosylate)	15	13603	25000	10241.7	25000	22235.3	25000	1543.6
LGX818 (Encorafenib)	15	6310.33	25000	839.4	25000	25737	8381	4982
Regorafenib	15	10731.3	25000	9868.33	25000	22253.7	25000	21891.3
Vemurafenib	15	9001.33	25000	1551.67	25000	9541.33	25000	6653.67
Volasertib	15	13.33	141.5	12.4133	63.12	159.8	256	137.8
Bafetinib	15	1412.33	6404	250.133	8453.67	5344	8474	1918.33
BSI-201 (Iniparib)	16	22439.3	25000	18693.3	25000	25000	25000	25000
Olaparib	16	7642.33	25000	1333.03	25000	15794.7	18711	8807.67
Rucaparib (phosphate)	16	6660.33	24749.3	2572.33	21984.7	9757	3427	4564.67
Veliparib (dihydrochloride)	16	25000	25000	25000	25000	25000	25000	25000
Prednisone	17	25000	25000	25000	25000	25000	25000	25000
Dexamethasone	17	740.1	25000	5.67867	25000	54.22	44.42	121.907
ABT-199 (Venetoclax)	18	4545	6.96033	2739	565.967	140.4	106.3	100.977
Obatoclax	18	213.167	334.867	31.3533	640.633	218.833	305.9	243.6
Y-27632	18	25000	25000	23060	25000	25000	25000	25000
QNZ (EVP4593)	19	370.167	3757.67	162.7	563.633	8.16633	4.777	11.2067
Omaveloxolone	19	101.38	417.8	13.6933	200.3	126.533	99.4	70.8667
Tipifarnib	20	8118.33	25000	825.9	24785	24139.3	13513	13225.7
SHP099	20	25000	25000	25000	25000	25000	25000	23211.7
SCH772984	20	10221	25000	562.233	25000	23977.3	25000	20317.7
Enasidenib	20	1325.37	6490.67	31.9633	9846.33	22119.7	25000	8885
Ivosidenib	20	4.62767	1909.33	4.51133	35.62	4.748	4.469	4.66167
Birinapant	21	3793	8534.33	2189.67	25000	20889.3	24524	15533.3
Ibrutinib	21	11977	19193.3	13051	23450.3	25000	25000	25000
Actinomycin D	21	25000	25000	25000	25000	25000	25000	25000
Tariquidar	21	25000	25000	25000	25000	25000	25000	25000
Enzastaurin	21	25000	25000	25000	25000	11556.3	25000	25000
KYA1797K	21	1818.67	25000	4188.67	12610	5619	2135	62.5233
Mechlorethamine hydrochloride	21	3878	12420	5001.67	12105.3	5625	2115	23.79
Selinexor	21	14.2267	300.533	12.2733	1116.67	43.3367	17.84	7.02533
Amsacrine	22	251.833	926.567	86.8167	498.3	169.2	35.68	26.2033
Cyclocytidine HCL	22	441.133	25000	2230.57	3921.67	4950.67	4702	10242.3
Bendamustine (hydrochloride)	23	24317.3	25000	25000	12058	25000	13509	16385
AZD6738	23	16756.3	25000	10547.7	5869.33	8117	15279	854.2
Omacetaxine Mepesuccinate (Homoharringtonine)	23	8.28567	1439.47	7.188	612.433	7.072	7.978	4.38
Staurosporin	23	5.43733	5.23167	4.78233	18.93	15.24	5.513	6.03667
Gilteritinib	24	5769	43977.7	9134	25000	15236.7	17517	12815.7
Prednisolone	25	16812.7	25000	43.8067	25000	483.9	441.4	576.467
Thiomyristoyl	26	25000	25000	25000	25000	25000	25000	25000
FK866	26	4.591	25000	5.20167	25000	14.6067	32.55	15.9933
