# Supplementary material for: An Autochthonous Mouse Model of Myd88 - and BCL2 -Driven Diffuse Large B-cell Lymphoma Reveals Actionable Molecular Vulnerabilities
Source: Oxford University Press journal article supplement (doi:10.1158/2643-3230.bcd-19-0059), 2020-11-02
Supplement: 26433230bcd190059-sup-232346_2_supp_6685054_q1xcsm.xlsx [file 26433230bcd190059-sup-232346_2_supp_6685054_q1xcsm.xlsx]

## Sheet: Clonality analysis primers
cDNA synthesis
Adapter:
Smart NNNNa adapter	AAGCAGUGGTAUCAACGCAGAGUNNNNUNNNNUNNNNUCTTrGrGrGrG
Reverse:
Igha rev 3	CGGAAGGGAAGTAATCGTGA
Ighm rev 3	GAGACGAGGGGGAAGACATT
Cg1_2_3 rev outer	rgamkgtgygcacacyrctggac
1st PCR
Forward:
M1SS	AAGCAGTGGTATCAACGCA
Reverse:
Igha rev 4	GCCGATTATCACTGGGTCAC
Ighm rev 2	AGACGAGGGGGAAGACATTT
Cg1_2_3 rev inner	rctcagggaartagccyttgac
2nd PCR
Barcode #	Name	Stacker	Barcode	Binding site	Total
1	F01	AT	AAGTA	CAGTGGTATCAACGCAGAG	ATAAGTACAGTGGTATCAACGCAGAG
2	F02	GAT	ACACG	CAGTGGTATCAACGCAGAG	GATACACGCAGTGGTATCAACGCAGAG
3	F03	cgat	CGCGC	CAGTGGTATCAACGCAGAG	cgatCGCGCCAGTGGTATCAACGCAGAG
4	F04	tcgat	CATGA	CAGTGGTATCAACGCAGAG	tcgatCATGACAGTGGTATCAACGCAGAG
5	F05	t	CGTTA	CAGTGGTATCAACGCAGAG	tCGTTACAGTGGTATCAACGCAGAG
6	F06	atcgat	TCCTT	CAGTGGTATCAACGCAGAG	atcgatTCCTTCAGTGGTATCAACGCAGAG
7	F07	gatcgat	AACGG	CAGTGGTATCAACGCAGAG	gatcgatAACGGCAGTGGTATCAACGCAGAG
8	F08	cgatcgat	GGTAA	CAGTGGTATCAACGCAGAG	cgatcgatGGTAACAGTGGTATCAACGCAGAG
9	F09	acgatcgat	GGACT	CAGTGGTATCAACGCAGAG	acgatcgatGGACTCAGTGGTATCAACGCAGAG
10	F10	t	AGAGA	CAGTGGTATCAACGCAGAG	tAGAGACAGTGGTATCAACGCAGAG
1	R_J4_1	AT	AAGTA	CCTTGACCCCAGTAGTCCAT	ATAAGTACCTTGACCCCAGTAGTCCAT
1	R_J1_1	AT	AAGTA	CCTGTGCCCCAGACATCGAA	ATAAGTACCTGTGCCCCAGACATCGAA
1	R_J3_1	AT	AAGTA	CCTTGGCCCCAGTAAGCAAA	ATAAGTACCTTGGCCCCAGTAAGCAAA
1	R_J2_1	AT	AAGTA	CCTTGGCCCCAGTAGTCAAA	ATAAGTACCTTGGCCCCAGTAGTCAAA
2	R_J4_2	GAT	ACACG	CCTTGACCCCAGTAGTCCAT	GATACACGCCTTGACCCCAGTAGTCCAT
2	R_J1_2	GAT	ACACG	CCTGTGCCCCAGACATCGAA	GATACACGCCTGTGCCCCAGACATCGAA
2	R_J3_2	GAT	ACACG	CCTTGGCCCCAGTAAGCAAA	GATACACGCCTTGGCCCCAGTAAGCAAA
2	R_J2_2	GAT	ACACG	CCTTGGCCCCAGTAGTCAAA	GATACACGCCTTGGCCCCAGTAGTCAAA
3	R_J4_3	cgat	CGCGC	CCTTGACCCCAGTAGTCCAT	cgatCGCGCCCTTGACCCCAGTAGTCCAT
3	R_J1_3	cgat	CGCGC	CCTGTGCCCCAGACATCGAA	cgatCGCGCCCTGTGCCCCAGACATCGAA
3	R_J3_3	cgat	CGCGC	CCTTGGCCCCAGTAAGCAAA	cgatCGCGCCCTTGGCCCCAGTAAGCAAA
3	R_J2_3	cgat	CGCGC	CCTTGGCCCCAGTAGTCAAA	cgatCGCGCCCTTGGCCCCAGTAGTCAAA
4	R_J4_4	tcgat	CATGA	CCTTGACCCCAGTAGTCCAT	tcgatCATGACCTTGACCCCAGTAGTCCAT
4	R_J1_4	tcgat	CATGA	CCTGTGCCCCAGACATCGAA	tcgatCATGACCTGTGCCCCAGACATCGAA
4	R_J3_4	tcgat	CATGA	CCTTGGCCCCAGTAAGCAAA	tcgatCATGACCTTGGCCCCAGTAAGCAAA
4	R_J2_4	tcgat	CATGA	CCTTGGCCCCAGTAGTCAAA	tcgatCATGACCTTGGCCCCAGTAGTCAAA
5	R_J4_5	t	CGTTA	CCTTGACCCCAGTAGTCCAT	tCGTTACCTTGACCCCAGTAGTCCAT
5	R_J1_5	t	CGTTA	CCTGTGCCCCAGACATCGAA	tCGTTACCTGTGCCCCAGACATCGAA
5	R_J3_5	t	CGTTA	CCTTGGCCCCAGTAAGCAAA	tCGTTACCTTGGCCCCAGTAAGCAAA
5	R_J2_5	t	CGTTA	CCTTGGCCCCAGTAGTCAAA	tCGTTACCTTGGCCCCAGTAGTCAAA
6	R_J4_6	atcgat	TCCTT	CCTTGACCCCAGTAGTCCAT	atcgatTCCTTCCTTGACCCCAGTAGTCCAT
6	R_J1_6	atcgat	TCCTT	CCTGTGCCCCAGACATCGAA	atcgatTCCTTCCTGTGCCCCAGACATCGAA
6	R_J3_6	atcgat	TCCTT	CCTTGGCCCCAGTAAGCAAA	atcgatTCCTTCCTTGGCCCCAGTAAGCAAA
6	R_J2_6	atcgat	TCCTT	CCTTGGCCCCAGTAGTCAAA	atcgatTCCTTCCTTGGCCCCAGTAGTCAAA
7	R_J4_7	gatcgat	AACGG	CCTTGACCCCAGTAGTCCAT	gatcgatAACGGCCTTGACCCCAGTAGTCCAT
7	R_J1_7	gatcgat	AACGG	CCTGTGCCCCAGACATCGAA	gatcgatAACGGCCTGTGCCCCAGACATCGAA
7	R_J3_7	gatcgat	AACGG	CCTTGGCCCCAGTAAGCAAA	gatcgatAACGGCCTTGGCCCCAGTAAGCAAA
7	R_J2_7	gatcgat	AACGG	CCTTGGCCCCAGTAGTCAAA	gatcgatAACGGCCTTGGCCCCAGTAGTCAAA
8	R_J4_8	cgatcgat	GGTAA	CCTTGACCCCAGTAGTCCAT	cgatcgatGGTAACCTTGACCCCAGTAGTCCAT
8	R_J1_8	cgatcgat	GGTAA	CCTGTGCCCCAGACATCGAA	cgatcgatGGTAACCTGTGCCCCAGACATCGAA
8	R_J3_8	cgatcgat	GGTAA	CCTTGGCCCCAGTAAGCAAA	cgatcgatGGTAACCTTGGCCCCAGTAAGCAAA
8	R_J2_8	cgatcgat	GGTAA	CCTTGGCCCCAGTAGTCAAA	cgatcgatGGTAACCTTGGCCCCAGTAGTCAAA
9	R_J4_9	acgatcgat	GGACT	CCTTGACCCCAGTAGTCCAT	acgatcgatGGACTCCTTGACCCCAGTAGTCCAT
9	R_J1_9	acgatcgat	GGACT	CCTGTGCCCCAGACATCGAA	acgatcgatGGACTCCTGTGCCCCAGACATCGAA
9	R_J3_9	acgatcgat	GGACT	CCTTGGCCCCAGTAAGCAAA	acgatcgatGGACTCCTTGGCCCCAGTAAGCAAA
9	R_J2_9	acgatcgat	GGACT	CCTTGGCCCCAGTAGTCAAA	acgatcgatGGACTCCTTGGCCCCAGTAGTCAAA
10	R_J4_10	t	AGAGA	CCTTGACCCCAGTAGTCCAT	tAGAGACCTTGACCCCAGTAGTCCAT
10	R_J1_10	t	AGAGA	CCTGTGCCCCAGACATCGAA	tAGAGACCTGTGCCCCAGACATCGAA
10	R_J3_10	t	AGAGA	CCTTGGCCCCAGTAAGCAAA	tAGAGACCTTGGCCCCAGTAAGCAAA
10	R_J2_10	t	AGAGA	CCTTGGCCCCAGTAGTCAAA	tAGAGACCTTGGCCCCAGTAGTCAAA

## Sheet: Clonality analysis samples
Barcode-sample mapping for the clonality analysis BCR sequencing data.
genotype	clonality	animal id	sequencing run	barcode #
MBC	27.7962	M552	BCR_01	1
MBC	98.8164	M307	BCR_01	2
MBC	85.8063	M108	BCR_01	3
MBC	42.4242	M693	BCR_01	4
MBC	65.1367	M191	BCR_01	9
MBC	96.8234	M551	BCR_02	1
MBC	92.6769	M649	BCR_02	2
MBC	99.0577	M636	BCR_02	3
MBC	64.8385	M659	BCR_02	5
MBC	77.2468	M718	BCR_02	6
MBC	96.1817	M785	BCR_02	7
WT	3.16179	BIF104	BCR_02	8
WT	2.50324	BIF105	BCR_02	9
WT	7.03162	BIF106	BCR_02	10
MBC	96.6506	M585	BCR_03	1
MBC	70.6093	M561	BCR_03	2
BC	6.4409	M73	BCR_03	4
MBC cell line	0.999346	M552L	BCR_04	5
MBC cell line	0.953039	M108L	BCR_04	6
MC	87.1916	M069	BCR_05	2
BC	59.0932	M238_1	BCR_05	4
BC	89.7294	M315	BCR_05	6
MBC	16.5408	M639_2	BCR_05	8
BC	15.4464	M541	BCR_05	10
MC	3.72093	M119	BCR_06	2
MBC	14.8907	M631_2	BCR_06	5
MC	11.8916	M455	BCR_06	7
MBC	56.9625	M705T	BCR_07	3
MBC	71.5704	M691	BCR_07	4
MBC	99.3761	M646	BCR_07	7
MBC	92.0652	M634_2	BCR_07	10
MBC	8.96552	M698	BCR_09	2
MBC	28.6636	M688	BCR_09	3
MBC	14.6204	M612	BCR_09	9
MBC	13.2612	M164	BCR_10	3
BC	36.0885	M788	BCR_10	5
MBC	82.567	M825	BCR_10	9
MBC	55.8296	M717	BCR_10	10

## Sheet: Full-length BCR seq primers
Primers used for full-length BCR repertoire analysis according to Turchaninova et al., 2016
First Strand Synthesis
SmartNNNa	5′ – template-switch adaptor. U = dU	AAGCAGUGGTAUCAACGCAGAGUNNNNUNNNNUNNNNUCTTrGrGrGrG
Mouse IGH cDNA synthesis primer mix
mIGG12_r1	Primer for cDNA synthesis, mouse IgG1/IgG2 heavy-chain mRNA	KKACAGTCACTGAGCTGCT
mIGG3_r1	Primer for cDNA synthesis, mouse IgG3 heavy-chain mRNA	GTACAGTCACCAAGCTGCT
mIGA_r1	Primer for cDNA synthesis, mouse IgA heavy-chain mRNA	CCAGGTCACATTCATCGTG
mIGM_r1	Primer for cDNA synthesis, mouse IgM heavy-chain mRNA	CTGGATGACTTCAGTGTTGT
mIGD_r1	Primer for cDNA synthesis, mouse IgD heavy-chain mRNA	GCCATTTCTCATTTCAGAGG
mIGE_r1	Primer for cDNA synthesis, mouse IgE heavy-chain mRNA	GTTCACAGTGCTCATGTTC
Mouse IGL cDNA synthesis primer mix
mIGLC_r1	Primer for cDNA synthesis, mouse IgL light-chain mRNA	TGTACCATYTGCCTTCCAG
mIGKC_r1	Primer for cDNA synthesis, mouse IgK light-chain mRNA	ACTGCCATCAATCTTCCAC
First PCR amplification
M1SS	Step-out primer 1, anneals on the switch adaptor, similar too previous primer	AAGCAGTGGTATCAACGCA
Mouse IGH reverse primer mix
MIGG12_r2	Nested primer with Z adaptor, mouse IgG1/IgG2 heavy-chain cDNA	ATTGGGCAGCCCTGATTAGTGGATAGACMGATG
mIGG3_r2	Nested primer with Z adaptor, mouse IgG3 heavy-chain cDNA	ATTGGGCAGCCCTGATTAAGGGATAGACAGATG
mIGA_r2	Nested primer with Z adaptor, mouse IgA heavy-chain cDNA	ATTGGGCAGCCCTGATTTCAGTGGGTAGATGGTG
mIGM_r2	Nested primer with Z adaptor, mouse IgM heavy-chain cDNA	ATTGGGCAGCCCTGATTGGGGGAAGACATTTGG
mIGD_r2	Nested primer with Z adaptor, mouse IgD heavy-chain cDNA	ATTGGGCAGCCCTGATTCTCTGAGAGGAGGAAC
mIGE_r2	Nested primer with Z adaptor, mouse IgE heavy-chain cDNA	ATTGGGCAGCCCTGATTAAGGGGTAGAGCTGAG
Mouse IGL reverse primer mix
mIGLC_r2	Nested primer with Z adaptor, mouse IgL light-chain cDNA	ATTGGGCAGCCCTGATTAGRGGAAGGTGGAAAC
mIGKC_r2	Nested primer with Z adaptor, mouse IgK light-chain cDNA	ATTGGGCAGCCCTGATTGGATGGTGGGAAGATG
Second PCR amplification
M1S	Nested primer, anneals on M1SS, similar to previous primer	(N)1-8(XXXXX)CAGTGGTATCAACGCAGAG
Z	Step-out primer	(N)1-8(XXXXX)ATTGGGCAGCCCTGATT
	XXXXX = Primer barcode
	(N)1-8 random nucleotides for better cluster differentiation
Barodes and stacker nucleotides
Barcode #	Stacker	Barcode
1	gatcgat	AAGTA
2	atcgat	ACACG
3	tcgat	CGCGC
4	cgat	CATGA
5	cgatcgat	CGTTA
6	GAT	TCCTT
7	AT	AACGG
8	t	GGTAA

## Sheet: Full-length BCR seq samples
Barcode-sample mapping for the full-length BCR sequencing experiment (Fig. S2).
animal id	genotype	barcode #
CHX_24	wt	1
CHX_25	wt	2
CHX_32	wt	3
CHX_33	wt	4
BIN_145	MBC	5
BIN_210	MBC	6
BIN_229	MBC	7
BIN_230	MBC	8
